# Supplementary material
Source: publisher site journal article supplement (https://www.dovepress.com/article/378759)
Supplement: Supplementary file 1 [file get_supplementary_file.php]

# Supplemental Materials: Exploring disease remission and bowel urgency severity among adults with moderate to severe ulcerative colitis: A qualitative study

**Table 1 Summary of the clinical characteristics of the participants (N=20**)

| **Clinical Characteristic** | **Moderately Active UC (N=14)** | **Severely Active UC (N=6)** | **Total (N=20)** |
| --- | --- | --- | --- |
| **Time since Diagnosis (Clinician-rated) (months)** | | | |
| Mean (SD) | 96.5 (129.51) | 140.7 (166.31) | 109.8 (138.52) |
| Median | 44.9 | 60.0 | 53.2 |
| Min/Max | 4/506 | 15/433 | 4/506 |
| Q1, Q3 | 37.1,106.1 | 28.8,247.3 | 32.9,118.6 |
|  |  |  |  |
| **Date of Last Sigmoidoscopy or Colonoscopy (months)** | | |  |
| Mean (SD) | 18.3 (32.29) | 18.0 (21.74) | 18.2 (28.94) |
| Median | 4.1 | 10.8 | 4.5 |
| Min/Max | 0/119 | 1/59 | 0/119 |
| Q1, Q3 | 2.1,24.8 | 2.0,24.1 | 2.0,24.4 |
|  |  |  |  |
| **Disease Activity (“at this time”)** |  |  |  |
| Remission (no symptoms) | 0 | 0 | 0 |
| Mild | 0 | 0 | 0 |
| Moderate | 14 (100.0%) | 0 | 14 (70.00%) |
| Severe | 0 | 6 (100.0%) | 6 (30.00%) |
| Very severe | 0 | 0 | 0 |
|  |  |  |  |
| **Disease Severity (“in general”)** |  |  |  |
| Remission (no symptoms) | 0 | 0 | 0 |
| Mild | 0 | 0 | 0 |
| Moderate | 14 (100.0%) | 2 (33.33%) | 16 (80.00%) |
| Severe | 0 | 4 (66.67%) | 4 (20.00%) |
| Very severe | 0 | 0 | 0 |
|  |  |  |  |
| **Current Treatment** |  |  |  |
| Aminosalicylates (5-ASA) | 9 | 2 | 11 (55.00%) |
| Biologics | 5 | 1 | 6 (30.00%) |
| Coriticosteroids | 1 | 1 | 2 (10.00%) |
| Immunosuppressants/ immunomodulators | 2 | 0 | 2 (10.00%) |
| JAK inhibitors | 0 | 0 | 0 |
| Other | 2 | 1 | 3 (15.00%) |
|  |  |  |  |
| **Previous Treatment** |  |  |  |
| Aminosalicylates (5-ASA) | 3 | 2 | 5 (25.00%) |
| Biologics | 1 | 2 | 3 (15.00%) |
| Coriticosteroids | 12 | 4 | 16 (80.00%) |
| Immunosuppressants/ immunomodulators | 0 | 0 | 0 |
| JAK inhibitors | 0 | 0 | 0 |
| Other | 2 | 1 | 3 (15.00%) |

**Abbreviations**: JAK, Janus kinase inhibitors; Q1, 25th percentile; Q3, 75th percentile; SD, standard deviation; UC, ulcerative colitis;

**Program**: t_el_1031_1_1_demog.sas; Analysis datasets: EL1031_DHIF_MHF; Runtime: 17JUN21:17:19:16; System User ID: emma.coggins

**Table 2 Relationship between PGIS change and PGIC score**

| **PGIC Response** | **1-Point Change** | **2-Point Change** | **3-Point Change** | **4-Point Change** | **5-Point Change** | **Total**  **(N=20)** |
| --- | --- | --- | --- | --- | --- | --- |
| Minimally Improved | 8 (100.0%) | 0 (0.0%) | 0 (0.0%) | 0 (0.0%) | 0 (0.0%) | 8 (40.0%) |
| Much Improved | 8 (100.0%) | 0 (0.0%) | 0 (0.0%) | 0 (0.0%) | 0 (0.0%) | 8 (40.0%) |
| Very Much Improved | 3 (75.0%) | 0 (0.0%) | 0 (0.0%) | 1 (25.0%) | 0 (0.0%) | 4 (20.0%) |
| Total (N=20) | 19 (95.0%) | 0 (0.0%) | 0 (0.0%) | 1 (5.0%) | 0 (0.0%) |  |
